# Supplementary material
Source: PubMed Central journal article supplement (PMC5777068)
Supplement: pnas.201716241SI.pdf [file pnas.201716241SI.pdf]

# Supporting Information

Little et al. 10.1073/pnas.1716241115

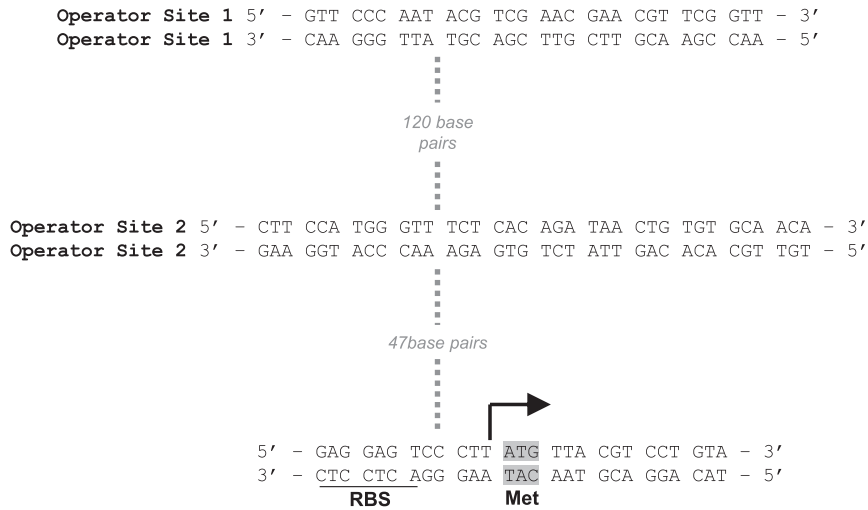

Fig. S1. Oligonucleotide sequences of predicted operator sites of the *E. coli* GUS operon. The ribosome binding site is underlined (RBS), and the *gusA* gene start site is shaded (Met).

|        | PNP-glucuronide<br>(PNPG) | PNP-gluco<br>(PNP-gluco) | Glucuronic Acid<br>(GlcA) |
|--------|---------------------------|--------------------------|---------------------------|
| EcGusR | 0.21 (0.07)               | NB                       | NB                        |
| SeGusR | 2.7 (0.4)                 | NB                       | NB                        |
| EcUxuR | NB                        | NB                       | NB                        |
| CpFadR | NB                        | NB                       | NB                        |
| SaGntR | NB                        | NB                       | NB                        |

Fig. S2. Binding of the indicated ligands by EcGusR, SeGusR, and related repressor proteins as measured by isothermal titration calorimetry (ITC). EcGusR and SeGusR both bound to PNP-glucuronide (PNPG) but failed to bind PNP-gluco or glucuronic acid (GlcA). Error values are reported in parentheses and italicized, and represent SDs. NB, no binding.

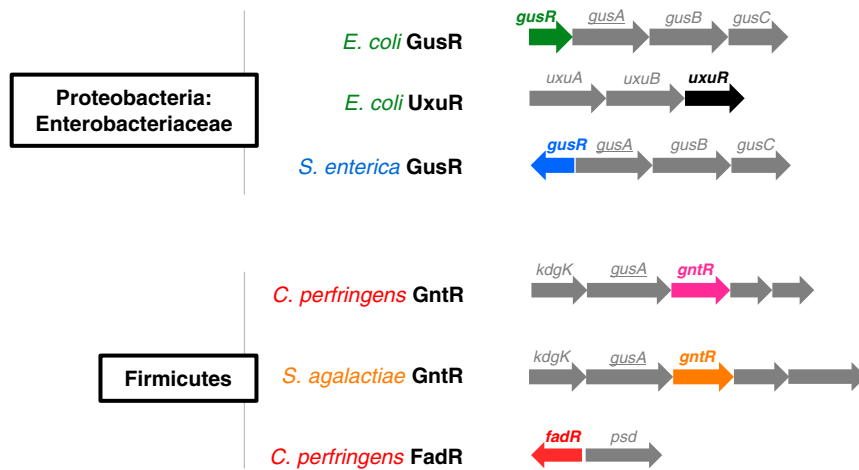

Fig. S3. Schematics showing the organization of genes near the GUS operons in the Enterobacteriaceae and putative GusR homologs in Firmicutes. The GUS operon and Uxu operon are separated by more than 2.5 million bp on the *E. coli* chromosome.

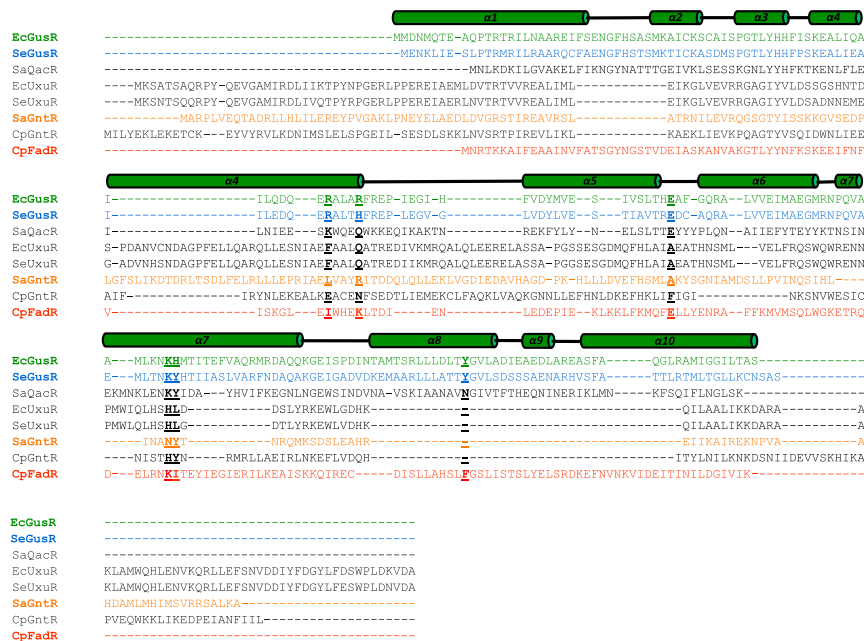

Fig. S4. Sequence alignment of EcGusR, SeGusR, and related repressor proteins, with the secondary structure of EcGusR shown and residues important for glucuronide recognition highlighted in bold and underlined. The names of the proteins whose structures are resolved here are indicated in bold on the left.

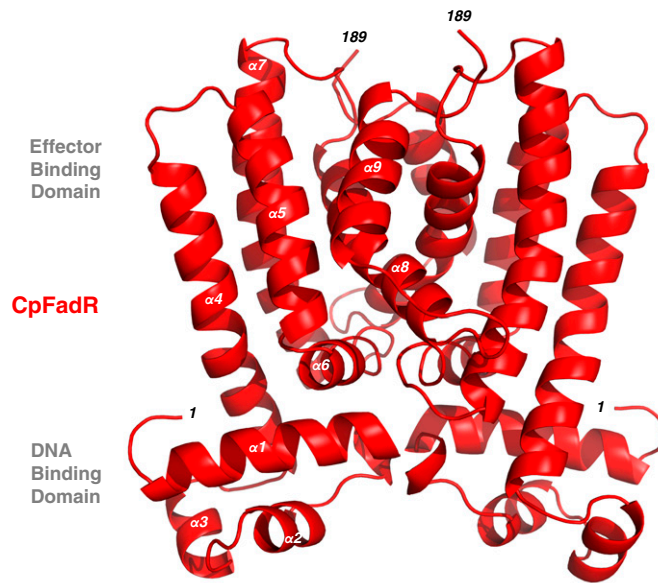

Fig. S5. Cartoon representation of the 1.8-Å crystal structure of the CpFadR homodimer (PDB ID code 6AZH).

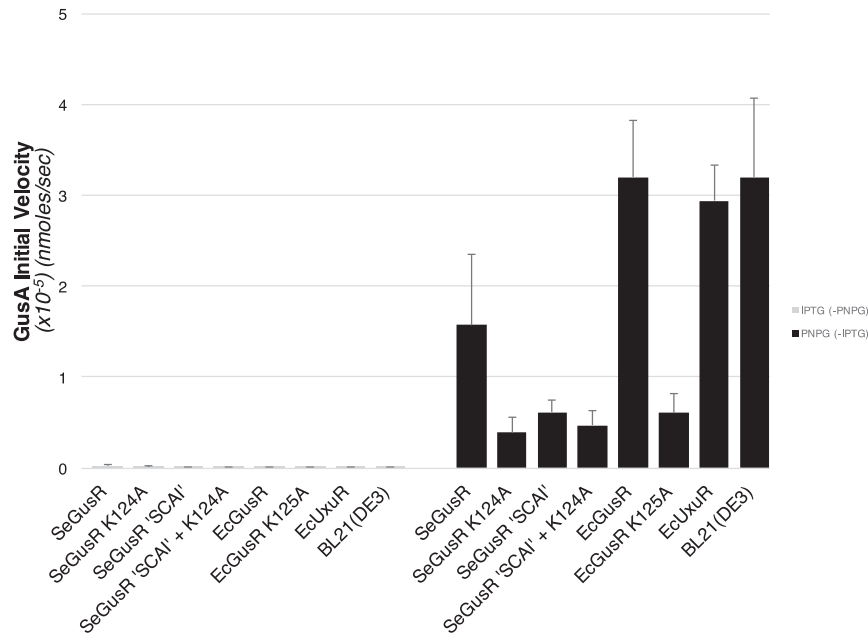

Fig. S6. Controls for *E. coli* cell-based GUS activity assay. A bar graph of initial velocities of GUS in cultured *E. coli* BL21 cells harboring either an empty expression plasmid or expression plasmids containing genes for the indicated proteins, both wild-type and variants. (Left) Only the IPTG inducer was added with no PNP, and nearly negligible GUS activity was observed. (Right) Only the GusR effector PNP (G) was added but no IPTG, and more modest levels of GUS activity were observed. All values are the mean of three biological triplicates, run in triplicate for each experiment, and error bars are SEMs.

**Table S1. X-ray crystallographic statistics**

| Protein                  | EcGusR                         | SeGusR                           | SaGntR                | CpFadR                |
|--------------------------|--------------------------------|----------------------------------|-----------------------|-----------------------|
| Space group              | P2 <sub>1</sub> 2 <sub>1</sub> | P2 <sub>1</sub> 2 <sub>1</sub> 2 | C2                    | P 2 <sub>1</sub>      |
| Unit cell                |                                |                                  |                       |                       |
| a, b, c, Å               | 51.0, 106.7, 135.3             | 52.7, 55.2, 60.5                 | 109.6, 105.2, 45.9    | 39.9, 93.9, 55.1      |
| α, β, γ, °               | 90, 90, 90                     | 90, 90, 90                       | 90, 112.44, 90        | 90.00, 96.07, 90.00   |
| Resolution range, Å      | 29.2–2.09 (2.17–2.09)          | 27.6–2.06 (2.13–2.06)            | 27.8–1.91 (1.98–1.91) | 29.1–1.78 (1.78–1.75) |
| Wavelength, Å            | 1.0332                         | 0.97939                          | 0.97935               | 0.97935               |
| Unique reflections       | 43,892 (3,995)                 | 11,394 (1,087)                   | 36,686 (3,545)        | 39,564 (2,181)        |
| Multiplicity             | 4.3 (3.0)                      | 2.0 (1.8)                        | 4.3 (2.4)             | 6.8 (7.1)             |
| Completeness, %          | 0.95 (0.92)                    | 0.99 (0.96)                      | 0.98 (0.96)           | 0.98 (0.98)           |
| I/σ                      | 13.5 (2.0)                     | 10.9 (2.2)                       | 16.3 (1.6)            | 23.7(3.5)             |
| Wilson B factor          | 33.2                           | 21.9                             | 27.0                  | 19.1                  |
| R <sub>work</sub>        | 0.189 (0.271)                  | 0.183 (0.275)                    | 0.215 (0.291)         | 0.196 (0.232)         |
| R <sub>free</sub>        | 0.233 (0.322)                  | 0.222 (0.322)                    | 0.250 (0.325)         | 0.225 (0.285)         |
| Molecules, a.u.          | 4                              | 1                                | 2                     | 2                     |
| Waters, a.u.             | 408                            | 114                              | 283                   | 438                   |
| Residues, a.u.           | 648                            | 192                              | 404                   | 373                   |
| Average B factor         | 40.1                           | 23.7                             | 30.3                  | 27.0                  |
| Rmsd, Å                  | 0.010                          | 0.010                            | 0.010                 | 0.010                 |
| Rmsd, °                  | 0.830                          | 0.510                            | 1.06                  | 0.740                 |
| Ramachandran favored, %  | 100                            | 98                               | 99                    | 99                    |
| Ramachandran outliers, % | 0                              | 0                                | 0                     | 0                     |
| PDB ID code              | 6AYI                           | 6AYH                             | 6AZ6                  | 6AZH                  |

Values for the highest resolution shell are indicated in parentheses.

**Table S2. Impact of GusR effector-binding pocket mutations on PNPG binding as measured by isothermal titration calorimetry**

| Ec/Se mutations                     | EcGusR, μM  | SeGusR, μM |
|-------------------------------------|-------------|------------|
| WT                                  | 0.21 (0.07) | 2.7 (0.5)  |
| H126Y/Y125H                         | 0.94 (0.04) | 2.6 (0.04) |
| R73H/H72R                           | 0.52 (0.01) | 2.1 (0.06) |
| M87L/L86M                           | 1.7 (0.06)  | 2.8 (0.1)  |
| H126Y+R73H /Y125H+H72R              | N/A         | 1.4 (0.1)  |
| H126Y+R73H+M87A/Y125H<br>+H72R+L86M | N/A         | 1.6 (0.01) |

Error values are reported in parentheses and italicized, and represent SDs. N/A, not applicable, because the corresponding mutants were not created.

**Table S3. Summary of GUS operon-containing organisms**

| Organism                       | Strain                                     | Complete GUS Operon | Note                                                  |
|--------------------------------|--------------------------------------------|---------------------|-------------------------------------------------------|
| <i>Escherichia coli</i>        | K12 MG1655 (NC_000913.3)                   | Yes                 |                                                       |
| <i>Escherichia coli</i>        | O157:H7 Sakai (NC_002695.1)                | No                  | No <i>gusA</i> and <i>gusC</i>                        |
| <i>Salmonella enterica</i>     | BCW_1559 (NZ_MXOA01000002.1)               | Yes                 |                                                       |
| <i>Shigella boydii</i>         | 600690 600690_30 (NZ_LPTQ01000029)         | No                  | Truncated <i>gusA</i> and <i>gusB</i>                 |
| <i>Shigella flexneri</i>       | 301 (NC_004337.2)                          | No                  | Truncated <i>gusB</i> /no <i>gusC</i>                 |
| <i>Shigella sonnei</i>         | FC1772 (NZ_NGWB010000048.1)                | Yes                 |                                                       |
| <i>Shigella dysenteriae</i>    | 225-75 gss22575.contig.38 (AKNG01000039.1) | Yes                 |                                                       |
| <i>Buttiauxella agrestis</i>   | MCE Contig_3 (NZ_JPRU01000002.1)           | Yes                 |                                                       |
| <i>Yersinia enterocolitica</i> | ERL053484 (NZ_CWGL01000004.1)              | Yes                 |                                                       |
| <i>Yersinia kristensenii</i>   | FCF326 (NZ_CPYI01000006.1)                 | Yes                 |                                                       |
| <i>Erwinia totetana</i>        | DAPP-PG 735 scf_2378_174.1 (NZ_KB372804.1) | Yes                 |                                                       |
| <i>Raoultella planticola</i>   | CHB Contig_16 (NZ_JPRG01000013.1)          | Yes                 |                                                       |
| <i>Klebsiella pneumoniae</i>   | KP38731 (NZ_CP014297)                      | Yes                 |                                                       |
| <i>Klebsiella oxytoca</i>      | 2880STGY5682666 (FKYV01000004.1)           | No                  | Truncated <i>gusA</i> and <i>gusB</i> /no <i>gusC</i> |

Organisms are labeled by genera and species, and the NCBI accession codes for each strain are listed (in parentheses and italicized).
